# Supplementary material for: Developmental transcriptome of resting cell formation in Mycobacterium smegmatis
Source: PubMed Central journal article supplement (PMC5081680; doi:10.1186/s12864-016-3190-4), 2016-10-26
Supplement: 12864_2016_3190_MOESM2_ESM.pdf [file 12864_2016_3190_MOESM2_ESM.pdf]

**Table S2** Functional classification of gene numbers up- and down-regulated during gentle starvation in PBS-Tween80

| Functional classification <sup>a</sup>                       | No. of genes <sup>b</sup> |      |      |      |      |      |      |      |      |
|--------------------------------------------------------------|---------------------------|------|------|------|------|------|------|------|------|
|                                                              | Total                     | 1h   |      | 3h   |      | 24h  |      | 14d  |      |
|                                                              |                           | Up   | Down | Up   | Down | Up   | Down | Up   | Down |
| Whole genome                                                 | 6716                      | 1185 | 1236 | 1212 | 1206 | 1509 | 1563 | 1476 | 1432 |
| Energy production and conversion                             | 510                       | 65   | 76   | 71   | 88   | 98   | 77   | 108  | 84   |
| Amino Acid metabolism and transport                          | 500                       | 107  | 71   | 117  | 82   | 106  | 85   | 97   | 72   |
| Nucleotide metabolism and transport                          | 103                       | 26   | 27   | 21   | 16   | 16   | 29   | 14   | 22   |
| Carbohydrate metabolism and transport                        | 434                       | 46   | 88   | 76   | 62   | 54   | 53   | 66   | 59   |
| Coenzyme metabolism and transport                            | 212                       | 25   | 42   | 18   | 50   | 22   | 59   | 34   | 44   |
| Lipid metabolism and transport                               | 505                       | 38   | 82   | 34   | 76   | 57   | 72   | 69   | 66   |
| Inorganic ion transport and metabolism                       | 282                       | 34   | 55   | 35   | 53   | 48   | 49   | 54   | 65   |
| Secondary metabolites biosynthesis, transport, catabolism    | 408                       | 38   | 62   | 49   | 64   | 68   | 46   | 60   | 55   |
| RNA processing and modification                              | 18                        | 4    | 0    | 5    | 2    | 4    | 2    | 2    | 2    |
| Chromatin structure and dynamics                             | 1                         | 1    | 0    | 0    | 0    | 0    | 0    | 0    | 0    |
| Translation, ribosomal structure and biogenesis              | 185                       | 9    | 92   | 12   | 97   | 11   | 99   | 11   | 39   |
| Transcription                                                | 600                       | 113  | 51   | 97   | 48   | 79   | 42   | 95   | 51   |
| Replication and repair                                       | 210                       | 23   | 32   | 22   | 44   | 16   | 29   | 9    | 41   |
| Cell cycle control, cell division, chromosome partitioning   | 30                        | 6    | 6    | 7    | 2    | 1    | 5    | 0    | 4    |
| Cell wall/membrane/envelop biogenesis                        | 179                       | 21   | 27   | 24   | 21   | 27   | 32   | 18   | 36   |
| Protein export                                               | 10                        | 0    | 1    | 1    | 1    | 2    | 1    | 1    | 1    |
| Posttranslational modification, protein turnover, chaperones | 139                       | 23   | 21   | 16   | 23   | 16   | 30   | 18   | 29   |
| Signal transduction mechanisms                               | 187                       | 37   | 15   | 55   | 10   | 54   | 11   | 50   | 19   |
| Intracellular trafficking and secretion                      | 28                        | 3    | 7    | 2    | 7    | 1    | 9    | 1    | 5    |
| Defense mechanisms                                           | 53                        | 9    | 6    | 7    | 7    | 6    | 10   | 8    | 13   |
| General functional prediction only                           | 858                       | 106  | 117  | 109  | 130  | 100  | 126  | 99   | 127  |
| Function unknown                                             | 408                       | 69   | 46   | 64   | 53   | 44   | 57   | 38   | 70   |
| Not in COGs                                                  | 856                       | 300  | 181  | 269  | 185  | 290  | 176  | 263  | 198  |

<sup>a</sup> According to COG (clusters of orthologous groups) from NCBI NC\_008596.

<sup>b</sup> Number of genes showing significant expression changes (>2-fold up- or down-regulation and a *P*-value<0.001 and false detection rate<0.005).
