# Supplementary material for: Developmental transcriptome of resting cell formation in Mycobacterium smegmatis
Source: PubMed Central journal article supplement (PMC5081680; doi:10.1186/s12864-016-3190-4), 2016-10-26
Supplement: 12864_2016_3190_MOESM3_ESM.pdf [file 12864_2016_3190_MOESM3_ESM.pdf]

**Table S3** Functional classification of gene numbers up- and down-regulated during shock starvation in PBS

| Functional classification <sup>a</sup>                       | No. of genes <sup>b</sup> |      |      |     |      |      |      |      |      |
|--------------------------------------------------------------|---------------------------|------|------|-----|------|------|------|------|------|
|                                                              | Total                     | 1h   |      | 3h  |      | 24h  |      | 14d  |      |
|                                                              |                           | Up   | Down | Up  | Down | Up   | Down | Up   | Down |
| Whole genome                                                 | 6716                      | 1000 | 1102 | 985 | 1091 | 1013 | 1015 | 1105 | 1091 |
| Energy production and conversion                             | 510                       | 71   | 68   | 83  | 84   | 84   | 75   | 104  | 78   |
| Amino Acid metabolism and transport                          | 500                       | 90   | 79   | 89  | 72   | 60   | 102  | 66   | 112  |
| Nucleotide metabolism and transport                          | 103                       | 21   | 27   | 20  | 26   | 11   | 29   | 7    | 29   |
| Carbohydrate metabolism and transport                        | 434                       | 60   | 57   | 64  | 66   | 61   | 54   | 56   | 57   |
| Coenzyme metabolism and transport                            | 212                       | 19   | 50   | 22  | 47   | 22   | 42   | 24   | 38   |
| Lipid metabolism and transport                               | 505                       | 48   | 78   | 36  | 78   | 79   | 60   | 106  | 59   |
| Inorganic ion transport and metabolism                       | 282                       | 34   | 53   | 32  | 62   | 35   | 61   | 37   | 62   |
| Secondary metabolites biosynthesis, transport, catabolism    | 408                       | 52   | 57   | 43  | 58   | 64   | 41   | 83   | 45   |
| RNA processing and modification                              | 18                        | 2    | 1    | 4   | 2    | 2    | 2    | 2    | 2    |
| Chromatin structure and dynamics                             | 1                         | 0    | 0    | 0   | 0    | 0    | 0    | 0    | 0    |
| Translation, ribosomal structure and biogenesis              | 185                       | 12   | 97   | 9   | 95   | 7    | 90   | 8    | 67   |
| Transcription                                                | 600                       | 104  | 52   | 107 | 41   | 122  | 45   | 141  | 41   |
| Replication and repair                                       | 210                       | 20   | 55   | 30  | 38   | 11   | 38   | 8    | 34   |
| Cell cycle control, cell division, chromosome partitioning   | 30                        | 3    | 8    | 5   | 4    | 3    | 5    | 2    | 8    |
| Cell wall/membrane/envelop biogenesis                        | 179                       | 29   | 26   | 22  | 26   | 17   | 28   | 13   | 32   |
| Protein export                                               | 10                        | 0    | 2    | 0   | 2    | 0    | 2    | 0    | 0    |
| Posttranslational modification, protein turnover, chaperones | 139                       | 18   | 27   | 25  | 25   | 25   | 31   | 22   | 33   |
| Signal transduction mechanisms                               | 187                       | 26   | 24   | 41  | 15   | 55   | 18   | 42   | 18   |
| Intracellular trafficking and secretion                      | 28                        | 2    | 6    | 3   | 7    | 3    | 7    | 3    | 4    |
| Defense mechanisms                                           | 53                        | 11   | 9    | 7   | 7    | 8    | 9    | 7    | 10   |
| General functional prediction only                           | 858                       | 121  | 106  | 109 | 113  | 103  | 110  | 115  | 115  |
| Function unknown                                             | 408                       | 59   | 52   | 63  | 52   | 58   | 64   | 44   | 61   |
| Not in COGs                                                  | 856                       | 277  | 266  | 255 | 260  | 278  | 284  | 355  | 269  |

<sup>a</sup> According to COG (clusters of orthologous groups) from NCBI NC\_008596.

<sup>b</sup> Number of genes showing significant expression changes (>2-fold up- or down-regulation and a *P*-value<0.001 and false detection rate<0.005).
