# Supplementary material for: Developmental transcriptome of resting cell formation in Mycobacterium smegmatis
Source: PubMed Central journal article supplement (PMC5081680; doi:10.1186/s12864-016-3190-4), 2016-10-26

1h

3h

24h

14d

a) Up-regulated transcripts

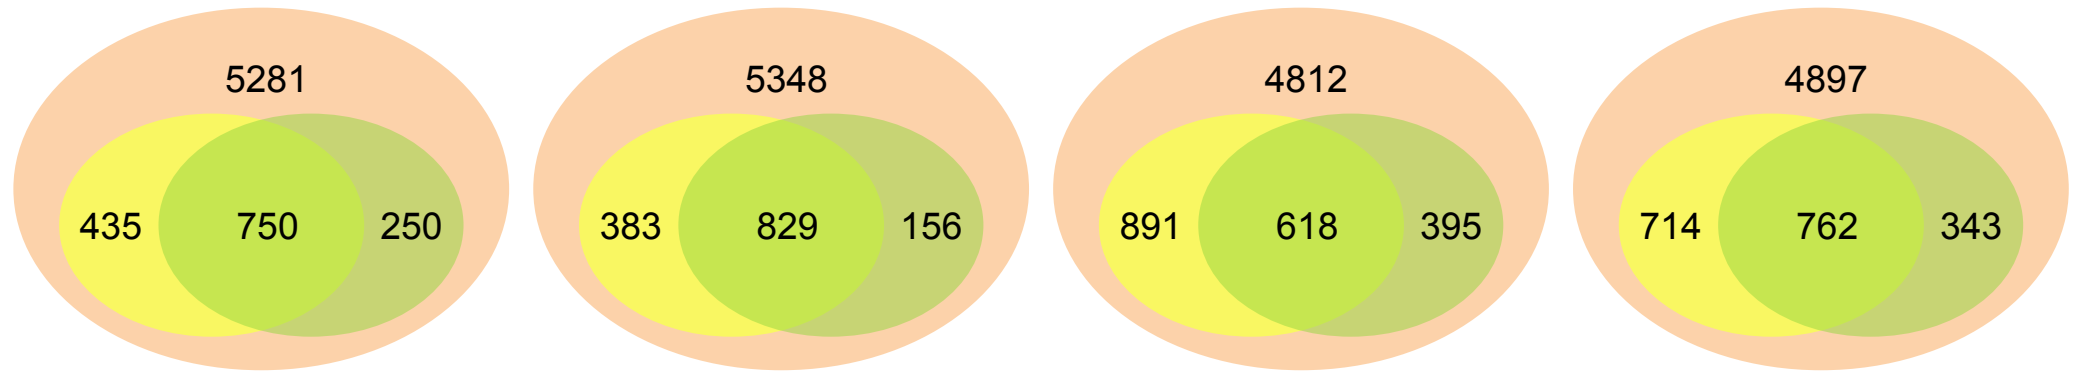

b) Down-regulated transcripts

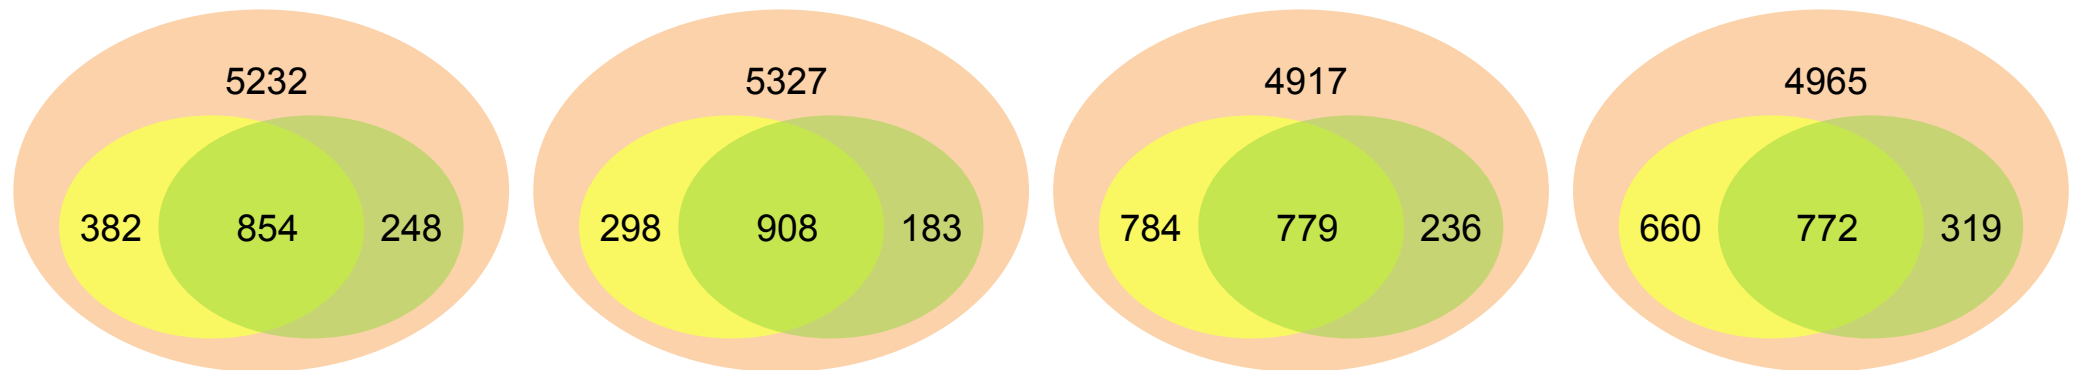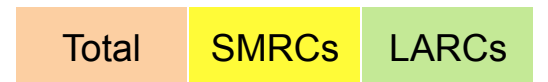

Supplement: 12864_2016_3190_MOESM4_ESM.pdf [file 12864_2016_3190_MOESM4_ESM.pdf]
