# Supplementary material for: Developmental transcriptome of resting cell formation in Mycobacterium smegmatis
Source: PubMed Central journal article supplement (PMC5081680; doi:10.1186/s12864-016-3190-4), 2016-10-26

**SMRCs up-regulated transcripts**  
(2703 / 6716)

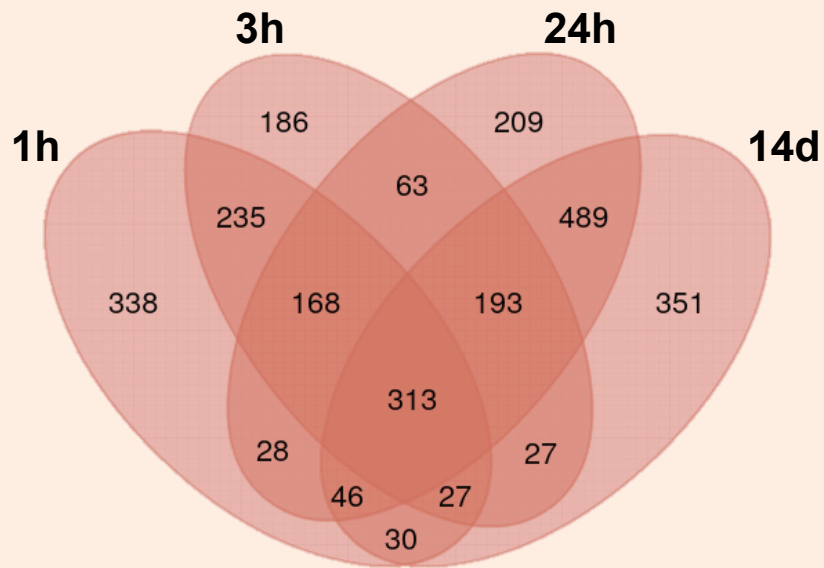

**SMRCs down-regulated transcripts**  
(2532 / 6716)

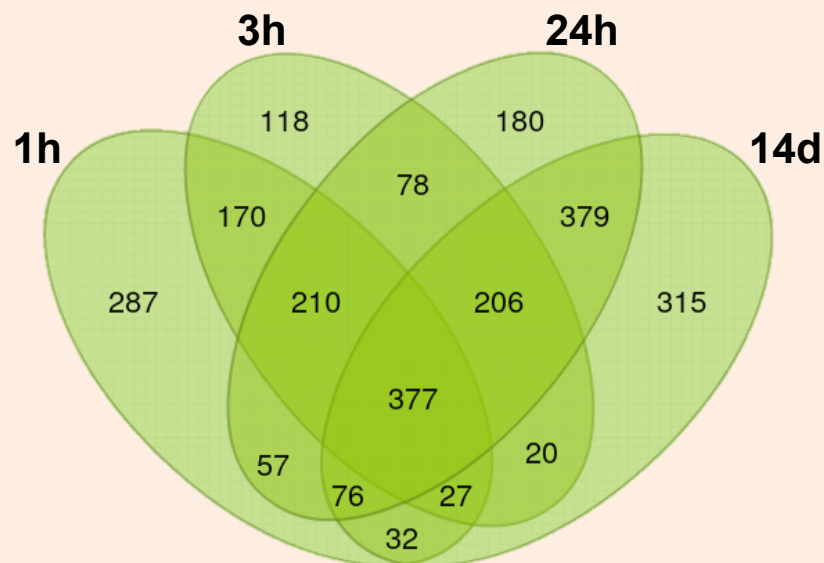

**LARCs up-regulated transcripts**  
(2180 / 6716)

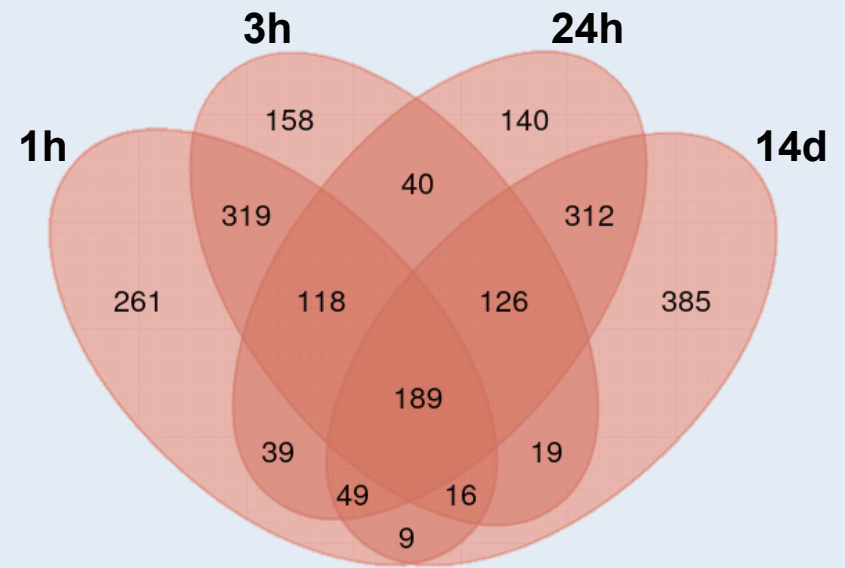

**LARCs down-regulated transcripts**  
(1983 / 6716)

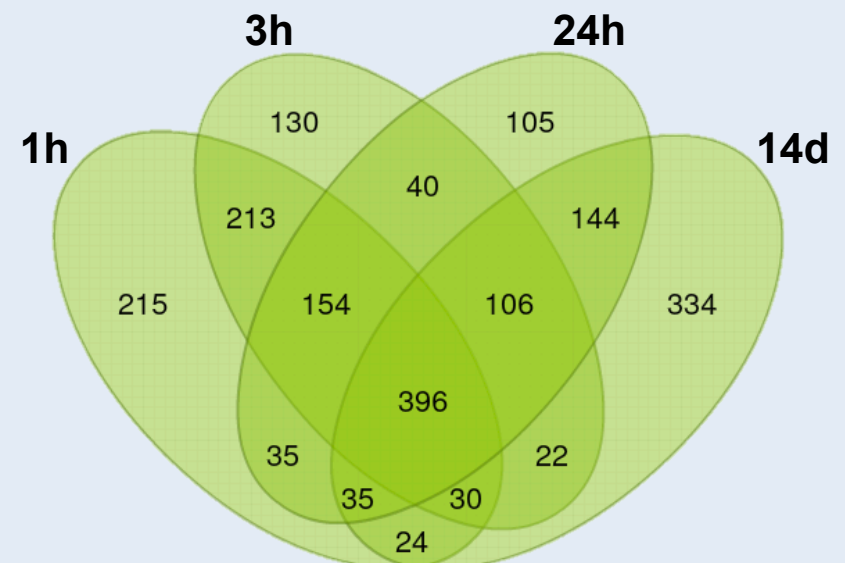

Supplement: 12864_2016_3190_MOESM5_ESM.pdf [file 12864_2016_3190_MOESM5_ESM.pdf]
